# Supplementary material for: Deciphering the pathogenesis of sporadic Creutzfeldt-Jakob disease with codon 129 M/V and type 2 abnormal prion protein
Source: PubMed Central journal article supplement (PMC3833290; doi:10.1186/2051-5960-1-74), 2013-11-13
Supplement: 2051-5960-1-74-S1.pdf [file 2051-5960-1-74-S1.pdf]

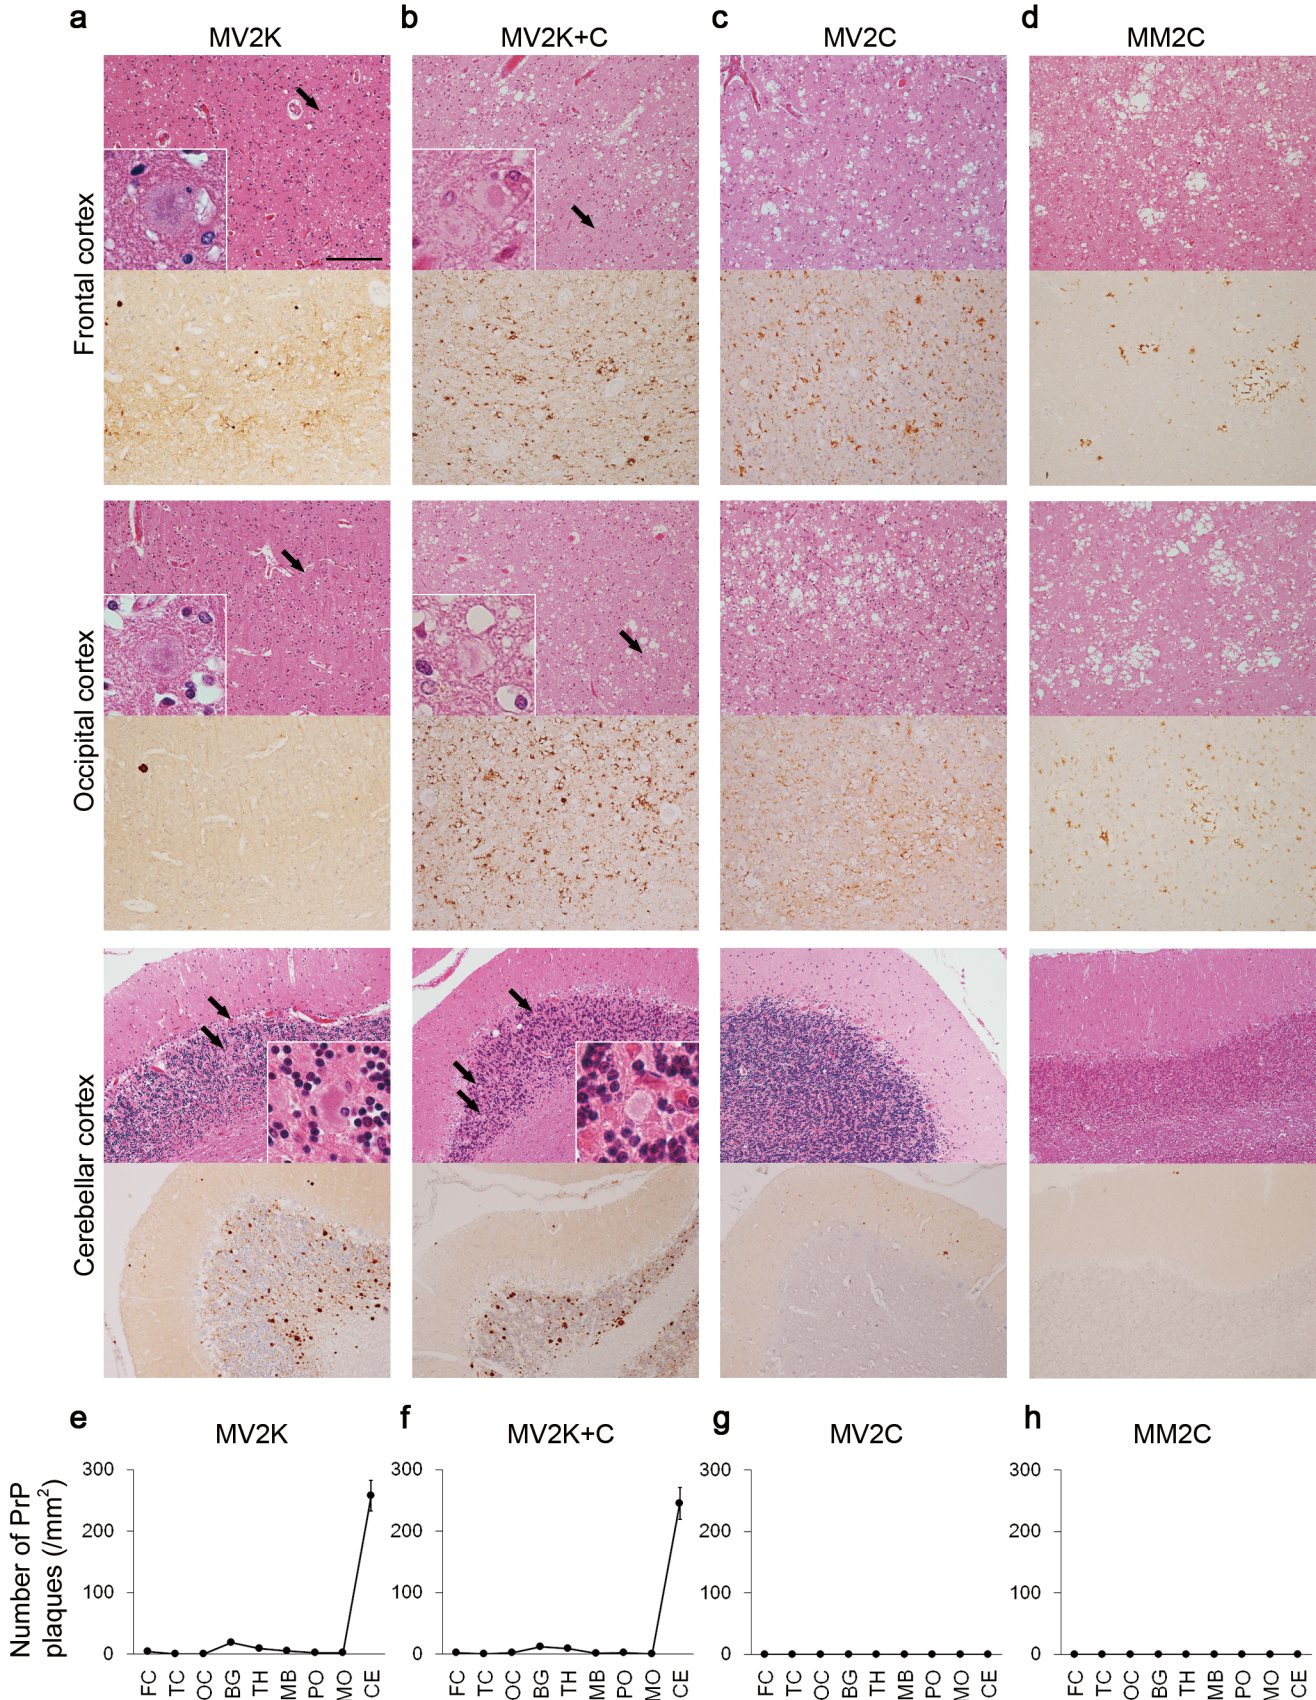

### Supplementary Fig. 1

Histotyping of the MV2 subgroups. (a-d) Histopathological features of MV2K (a), MV2K+C (b), MV2C (c), or MM2C (d). Hematoxylin and eosin stain and immunohistochemistry for PrP. Higher magnification of kuru plaques (arrows) is shown in the insets. Scale bar: 100  $\mu$ m. (e-h) Regional distribution of PrP plaques in MV2K (e), MV2K+C (f), MV2C (g), or MM2C (h). Data are presented as mean  $\pm$  SEM. FC, frontal cortex; TC, temporal cortex; OC, occipital cortex; BG, basal ganglia (putamen); TH, thalamus (dorsomedial nucleus); MB, midbrain; PO, pons; MO, medulla; CE, cerebellum (granular cell layer).
