# Supplementary material for: Deciphering the pathogenesis of sporadic Creutzfeldt-Jakob disease with codon 129 M/V and type 2 abnormal prion protein
Source: PubMed Central journal article supplement (PMC3833290; doi:10.1186/2051-5960-1-74), 2013-11-13
Supplement: 2051-5960-1-74-S2.pdf [file 2051-5960-1-74-S2.pdf]

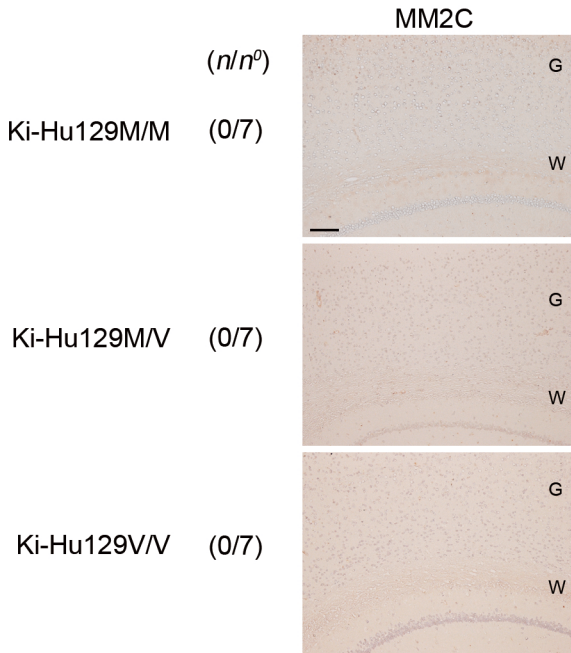

## Supplementary Fig. 2

Immunohistochemical analysis of PrP in the brains of MM2C-inoculated PrP-humanized mice.  $n$ , number of mice positive for PrP accumulation in immunohistochemical analysis;  $n^0$ , number of inoculated mice. G, grey matter; W, white matter. Scale bar: 100  $\mu$ m.
